# Supplementary material for: Tailoring of Novel Azithromycin-Loaded Zinc Oxide Nanoparticles for Wound Healing
Source: MDPI journal article supplement (doi:10.3390/pharmaceutics14010111), 2022-01-05
Supplement: s1 [file s1]

# Supplementary Materials: Tailoring of Novel Azithromycin-Loaded Zinc Oxid Nanoparticles for Wound Healing

Mohammed S. Saddik, Mahmoud M.A. Elsayed \*, Mohamed A. El-Mokhtar, Haitham Sedky, Jelan A. Abdel-Aleem, Ahmed M. Abu-Dief, Mostafa F. Al-Hakkani, Hazem L. Hussein, Samah A. Al-Shelkamy, Fatma Y. Meligy, Ali Khames and Heba A. Abou-Taleb

Table S1. X – ray data of the prepared ZnO nanoparticles.

| 2 $\theta$<br>Reference | 2 $\theta$ hkl<br>Measured | Miller indices |     |     |
|-------------------------|----------------------------|----------------|-----|-----|
|                         |                            | h              | k   | l   |
| 31.7729                 | 31.775                     | 1              | 0   | 0   |
| 34.4268                 | 34.425                     | 0              | 0   | 2   |
| 36.2585                 | 36.275                     | 1              | 0   | 1   |
| 47.5466                 | 47.525                     | 1              | 0   | 2   |
| 56.6023                 | 56.575                     | 1              | 1   | 0   |
| 62.8681                 | 62.875                     | 1              | 0   | 3   |
| 66.3862                 | 66.375                     | 2              | 0   | 0   |
| 67.9599                 | 67.925                     | 1              | 1   | 2   |
| 69.0953                 | 69.075                     | 2              | 0   | 1   |
| 72.5819                 | 72.525                     | 0              | 0   | 4   |
| 76.9756                 | 76.975                     | 2              | 0   | 2   |
| Average                 | ---                        | ---            | --- | --- |
